# Supplementary material
Source: PubMed Central journal article supplement (PMC7876876)
Supplement: advancesADV2020003806-suppl1.pdf [file advancesADV2020003806-suppl1.pdf]

Impact of treatment delay in acute myeloid leukemia revisited. Juliusson et al.

**Supplement Table 1.** Clinical characteristics by Time from Diagnosis to Treatment (TDT).

|                                            |              | 0-5d N=1587 | 6-10d N=466 | 11-15d N=157 | >15d N=164  | Total: 2374 |
|--------------------------------------------|--------------|-------------|-------------|--------------|-------------|-------------|
| Sex                                        | Male         | 848 (54%)   | 262 (56%)   | 83 (53%)     | 96 (59%)    | 1289 (54%)  |
|                                            | Female       | 739 (47%)   | 204 (44%)   | 74 (47%)     | 68 (42%)    | 1085 (46%)  |
| Age (years)                                | Mean (SD)    | 59.4 (15)   | 64.4 (12)   | 64.9 (12)    | 63.6 (12)   | 61.0 (14)   |
|                                            | Median (IQR) | 63 (50-71)  | 66 (60-73)  | 67 (59-73)   | 66 (59-71)  | 64 (53-72)  |
| CR                                         |              | 1270 (80%)  | 331 (71%)   | 109 (69%)    | 113 (69%)   | 1823 (77%)  |
| AlloSCT                                    | Yes, in CR1  | 418 (26%)   | 88 (19%)    | 32 (20%)     | 35 (21%)    | 573 (24%)   |
|                                            | Yes, other   | 101 (6%)    | 23 (5%)     | 8 (5%)       | 7 (4%)      | 139 (6%)    |
|                                            | No           | 1068 (67%)  | 355 (76%)   | 117 (75%)    | 122 (74%)   | 1662 (70%)  |
| AML type                                   | De novo      | 1293 (82%)  | 321 (69%)   | 104 (66%)    | 90 (55%)    | 1808 (76%)  |
|                                            | tAML         | 86 (5%)     | 49 (11%)    | 15 (10%)     | 33 (20%)    | 183 (8%)    |
|                                            | Sec AML      | 208 (13%)   | 96 (21%)    | 38 (24%)     | 41 (25%)    | 383 (16%)   |
| ECOG Performance Status                    | 0            | 427 (28%)   | 159 (35%)   | 50 (33%)     | 54 (33%)    | 690 (30%)   |
|                                            | I            | 848 (55%)   | 235 (52%)   | 79 (52%)     | 83 (51%)    | 1245 (54%)  |
|                                            | II           | 159 (10%)   | 41 (9%)     | 19 (12%)     | 19 (12%)    | 238 (10%)   |
|                                            | III          | 66 (4%)     | 17 (4%)     | 3 (2%)       | 5 (3%)      | 91 (4%)     |
|                                            | IV           | 35 (2%)     | 3 (1%)      | 2 (1%)       | 1 (1%)      | 41 (2%)     |
| Bone marrow blast (%)                      | Mean (SD)    | 57 (24)     | 45 (23)     | 39 (22)      | 35 (23)     | 53 (25)     |
|                                            | Median (IQR) | 60 (37-80)  | 40 (25-62)  | 35 (23-51)   | 29 (21-47)  | 50 (30-75)  |
| Hemoglobin g/Liter                         | Mean (SD)    | 93 (20)     | 96 (20)     | 98 (18)      | 99 (20)     | 94 (20)     |
|                                            | Median (IQR) | 94 (81-107) | 96 (84-108) | 96 (87-109)  | 97 (86-111) | 94 (82-107) |
| Platelet count x10 <sup>9</sup> /L         | Mean (SD)    | 86 (90)     | 106 (102)   | 116 (97)     | 114 (125)   | 94 (96)     |
|                                            | Median (IQR) | 60 (32-107) | 81 (38-146) | 89 (44-157)  | 74 (40-153) | 65 (34-122) |
| White blood cell count x10 <sup>9</sup> /L | Mean (SD)    | 42.6 (63.7) | 17.4 (36.6) | 16.0 (31.5)  | 16.2 (35.6) | 34.1 (57.2) |
|                                            | Median (IQR) | 16.1 (3-54) | 3.6 (2-13)  | 3.1 (2-13)   | 4.5 (2-12)  | 8.7 (2-40)  |
| WBC groups by cell counts                  | <5           | 526 (33%)   | 267 (57%)   | 101 (64%)    | 87 (53.0%)  | 981 (41%)   |
|                                            | 5-10         | 147 (9%)    | 50 (11%)    | 11 (7%)      | 32 (20%)    | 240 (10%)   |
|                                            | 10-20        | 182 (12%)   | 56 (12%)    | 14 (9%)      | 18 (11%)    | 270 (11%)   |
|                                            | 20-50        | 301 (19%)   | 48 (10%)    | 15 (10%)     | 13 (8%)     | 377 (16%)   |
|                                            | 50-100       | 219 (14%)   | 26 (6%)     | 9 (6%)       | 5 (3%)      | 259 (11%)   |
|                                            | 100-200      | 153 (10%)   | 13 (3%)     | 7 (5%)       | 8 (5%)      | 181 (8%)    |
|                                            | >200         | 55 (4%)     | 5 (1%)      | 0 (0%)       | 1 (1%)      | 61 (3%)     |
| LDH ukat/L Normal <4.2                     | Mean (SD)    | 11.1 (16)   | 7.9 (12)    | 8.0 (14)     | 7.3 (13)    | 10.0 (15)   |
|                                            | Median (IQR) | 6.8 (4-12)  | 4.5 (4-7)   | 4.6 (3-7)    | 4.2 (3-6)   | 5.9 (4-10)  |
| Heart disease                              |              | 269 (17%)   | 109 (23%)   | 36 (23%)     | 42 (26%)    | 456 (19%)   |
| Diabetes                                   |              | 112 (7%)    | 42 (9%)     | 19 (12%)     | 12 (7%)     | 185 (8%)    |
| FLT3_ITD                                   |              | 303 (28%)   | 44 (17%)    | 19 (23%)     | 9 (13%)     | 375 (25%)   |
| NPM1-mutation                              |              | 349 (34%)   | 64 (26%)    | 12 (16%)     | 17 (27%)    | 442 (32%)   |
| Favorable risk                             |              | 298 (20%)   | 57(13.6%)   | 9(6.7%)      | 16(11.3%)   | 380(17.6%)  |
| Intermediate                               |              | 699 (48%)   | 203 (48%)   | 70 (52%)     | 90 (64%)    | 1062 (49%)  |
| Adverse                                    |              | 472 (32%)   | 160 (38%)   | 55 (41%)     | 35 (25%)    | 722 (33%)   |

**Supplement Table 2.** Clinical characteristics by TDT, with alternate grouping.

|                                            |              | 0-1d N=583  | 2-3d N=670  | 4-6d N=469  | >6d N=652   | Total: 2374 |
|--------------------------------------------|--------------|-------------|-------------|-------------|-------------|-------------|
| Sex                                        | M            | 323 (55%)   | 349 (52%)   | 254 (54%)   | 363 (56%)   | 1289 (54%)  |
|                                            | F            | 260 (45%)   | 321 (48%)   | 215 (46%)   | 289 (44%)   | 1085 (46%)  |
| Age (years)                                | Mean (SD)    | 57.3 (15)   | 60.2 (15)   | 62.1 (14)   | 64.4 (12)   | 61.0 (14)   |
|                                            | Median (IQR) | 61 (48-69)  | 64 (52-72)  | 65 (55-72)  | 67 (60-73)  | 64 (53-72)  |
|                                            | Range        | 17-87       | 19-84       | 18-85       | 18-85       | 17-87       |
| CR                                         |              | 466 (80%)   | 541 (81%)   | 360 (77%)   | 456 (70 %)  | 1823(77%)   |
| AlloSCT                                    | Yes, in CR1  | 167 (29%)   | 180 (27%)   | 93 (20%)    | 133 (20%)   | 573 (24%)   |
|                                            | Yes, other   | 38 (7%)     | 40 (6%)     | 31 (7%)     | 30 (5%)     | 139 (6%)    |
|                                            | No           | 378 (65%)   | 450 (67%)   | 345 (74%)   | 489 (75%)   | 1662 (70%)  |
| AML type                                   | de novo      | 514 (88%)   | 534 (80%)   | 334 (71%)   | 426 (65%)   | 1808 (76%)  |
|                                            | tAML         | 23 (4%)     | 35 (5%)     | 46 (10%)    | 79 (12%)    | 183 (8%)    |
|                                            | Sec AML      | 46 (8%)     | 101 (15%)   | 89 (19%)    | 147 (23%)   | 383 (16%)   |
| ECOG Performance status                    | 0            | 139 (25%)   | 185 (29%)   | 151 (33%)   | 215 (34%)   | 690 (30%)   |
|                                            | I            | 297 (53%)   | 366 (56%)   | 257 (56%)   | 325 (51%)   | 1245 (54%)  |
|                                            | II           | 68 (12%)    | 66 (10%)    | 34 (7%)     | 70 (11%)    | 238 (10%)   |
|                                            | III          | 35 (6%)     | 23 (4%)     | 12 (3%)     | 21 (3%)     | 91 (4%)     |
|                                            | IV           | 19 (3%)     | 9 (1%)      | 8 (2%)      | 5 (1%)      | 41 (2%)     |
| Bone marrow blasts (%)                     | Mean (SD)    | 63 (24)     | 56 (23)     | 51 (24)     | 41 (23)     | 53 (25)     |
|                                            | Median (IQR) | 69 (44-85)  | 56 (35-75)  | 50 (30-72)  | 34 (24-55)  | 50 (30-75)  |
| Hemoglobin, g/L                            | Mean (SD)    | 93 (20)     | 923 (20)    | 95 (21)     | 97 (19)     | 94 (20)     |
|                                            | Median (IQR) | 94 (79-107) | 93 (80-105) | 94 (84-108) | 97 (85-109) | 94 (82-107) |
| Platelet count x10 <sup>9</sup> /L         | Mean (SD)    | 78 (88)     | 87 (84)     | 94 (92)     | 114 (112)   | 94 (96)     |
|                                            | Median (IQR) | 55 (30-98)  | 62 (33-114) | 70 (33-123) | 84 (40-155) | 65 (34-122) |
| White blood cell count x10 <sup>9</sup> /L | Mean (SD)    | 62.6 (77)   | 35.6 (56)   | 21.7 (38)   | 15.9 (34)   | 34.1 (57)   |
|                                            | Median (IQR) | 33 (6-93)   | 14.5 (2-45) | 6.2 (2-24)  | 3.7 (2-13)  | 8.7 (2-40)  |
| WBC groups by cell counts                  | <5           | 136 (23%)   | 242 (36%)   | 223 (48%)   | 380 (58%)   | 981 (41%)   |
|                                            | 5-10         | 52 (9%)     | 54 (8%)     | 52 (11%)    | 82 (13%)    | 240 (10%)   |
|                                            | 10-20        | 57 (10%)    | 79 (12%)    | 64 (14%)    | 70 (11%)    | 270 (11%)   |
|                                            | 20-50        | 101 (17%)   | 146 (22%)   | 69 (15%)    | 61 (9%)     | 377 (16%)   |
|                                            | 50-100       | 102 (18%)   | 84 (13%)    | 40 (9%)     | 33 (5%)     | 259 (11%)   |
|                                            | 100-200      | 94 (16%)    | 50 (8%)     | 16 (3%)     | 21 (3%)     | 181 (8%)    |
|                                            | >200         | 39 (7%)     | 13 (2%)     | 4 (1%)      | 5 (1%)      | 61 (3%)     |
| LDH ukat/L Normal <4.2                     | Mean (SD)    | 13.8 (19)   | 10.1 (13)   | 8.3 (15)    | 7.8 (13)    | 10.0 (15)   |
|                                            | Median (IQR) | 8.8 (5-16)  | 6.5 (4-11)  | 5.4 (4-8)   | 4.5 (3-7)   | 5.9 (4-10)  |
| Heart disease                              |              | 69 (12%)    | 133 (20%)   | 98 (21%)    | 156 (24%)   | 456 (19%)   |
| Diabetes                                   |              | 30 (5%)     | 51 (8%)     | 42 (9%)     | 62 (10%)    | 185 (8%)    |
| <i>FLT3_ITD</i>                            |              | 150 (35%)   | 105 (24%)   | 62 (23%)    | 58 (18%)    | 375 (25%)   |
| <i>NPM1</i>                                |              | 143 (34%)   | 141 (34%)   | 83 (32%)    | 75 (24%)    | 442 (32%)   |
| Genetic Risk                               | Favorable    | 108 (20%)   | 134 (21%)   | 70 (17%)    | 68 (12%)    | 380 (18%)   |
|                                            | Intermediate | 268 (49%)   | 284 (45%)   | 212 (51%)   | 298 (52%)   | 1062 (49%)  |
|                                            | Adverse      | 174 (32%)   | 207 (33%)   | 132 (32%)   | 209 (36%)   | 722 (33%)   |

**Supplement Table 3.** Survival analysis by Cox regression.

|                                  |              | N    | Univariate         |            |         | Multivariate       |           |         |
|----------------------------------|--------------|------|--------------------|------------|---------|--------------------|-----------|---------|
|                                  |              |      | HR                 | CI 95%     | P-value | HR                 | CI 95%    | P-value |
| Time from Diagnosis to Treatment | 0-5d         | 1587 | 1                  | -          | -       | 1                  | -         | -       |
|                                  | 6-10d        | 466  | 1.36               | 1.20-1.53  | <0.001  | 1.15               | 1.00-1.33 | 0.054   |
|                                  | 11-15d       | 157  | 1.28               | 1.06-1.55  | 0.012   | 1.06               | 0.85-1.33 | 0.599   |
|                                  | >15d         | 164  | 1.34               | 1.11-1.62  | 0.002   | 1.12               | 0.89-1.41 | 0.316   |
|                                  |              |      | P(overall): <0.001 |            |         | P(overall): 0.267  |           |         |
| Sex                              | Male         | 1289 | 1                  | -          | -       | 1                  | -         | -       |
|                                  | Female       | 1085 | 0.97               | 0.88-1.08  | 0.609   | 1.06               | 0.94-1.18 | 0.340   |
| Age (years)                      | (continuous) | 2374 | 1.04               | 1.03-1.04  | <0.001  | 1.04               | 1.03-1.04 | <0.001  |
| CR                               | Yes          | 1823 | 1                  | -          | -       |                    |           |         |
|                                  | No           | 546  | 9.67               | 8.58-10.90 | <0.001  |                    |           |         |
|                                  | Missing      | 5    |                    |            |         |                    |           |         |
| AlloSCT                          | Yes, in CR1  | 573  | 1                  | -          | -       |                    |           |         |
|                                  | Yes, other   | 139  | 1.42               | 1.10-1.85  | 0.008   |                    |           |         |
|                                  | No           | 1662 | 3.58               | 3.10-4.13  | <0.001  |                    |           |         |
|                                  |              |      | P(overall): <0.001 |            |         |                    |           |         |
| AML type                         | De novo      | 1808 | 1                  | -          | -       | 1                  | -         | -       |
|                                  | tAML         | 183  | 2.00               | 1.69-2.37  | <0.001  | 1.68               | 1.38-2.05 | <0.001  |
|                                  | Sec AML      | 383  | 2.04               | 1.80-2.31  | <0.001  | 1.66               | 1.43-1.92 | <0.001  |
|                                  |              |      | P(overall): <0.001 |            |         | P(overall): <0.001 |           |         |
| ECOG performance status          | 0            | 690  | 1                  | -          | -       | 1                  | -         | -       |
|                                  | I            | 1245 | 1.29               | 1.15-1.45  | <0.001  | 1.14               | 0.99-1.30 | 0.066   |
|                                  | II           | 238  | 1.85               | 1.55-2.21  | <0.001  | 1.39               | 1.14-1.71 | 0.002   |
|                                  | III          | 91   | 2.84               | 2.23-3.63  | <0.001  | 2.62               | 1.98-3.48 | <0.001  |
|                                  | IV           | 41   | 3.70               | 2.62-5.23  | <0.001  | 3.92               | 2.44-6.28 | <0.001  |
|                                  | Missing      | 69   | P(overall): <0.001 |            |         | P(overall): <0.001 |           |         |
| BM blast %                       | (continuous) | 2297 | 1.00               | 1.00-1.00  | 0.135   | 1.00               | 1.00-1.00 | 0.641   |
|                                  | Missing      | 77   |                    |            |         |                    |           |         |
| Hemoglobin                       | (continuous) | 2368 | 1.00               | 0.99-1.00  | 0.010   | 1.00               | 0.99-1.00 | 0.103   |
|                                  | Missing      | 6    |                    |            |         |                    |           |         |
| Platelet count                   | (continuous) | 2364 | 1.00               | 1.00-1.00  | 0.047   | 1.00               | 1.00-1.00 | 0.306   |
|                                  | Missing      | 10   |                    |            |         |                    |           |         |
| WBC group                        | <5           | 981  | 1                  | -          | -       | 1                  | -         | -       |
|                                  | 5-10         | 240  | 1.06               | 0.89-1.25  | 0.534   | 1.44               | 1.18-1.75 | <0.001  |
|                                  | 10-20        | 270  | 0.91               | 0.77-1.08  | 0.290   | 1.15               | 0.94-1.39 | 0.167   |
|                                  | 20-50        | 377  | 1.06               | 0.91-1.22  | 0.468   | 1.38               | 1.16-1.64 | <0.001  |
|                                  | 50-100       | 259  | 1.08               | 0.91-1.27  | 0.392   | 1.33               | 1.08-1.64 | 0.007   |
|                                  | 100-200      | 181  | 1.40               | 1.16-1.68  | <0.001  | 1.87               | 1.50-2.33 | <0.001  |
|                                  | >200         | 61   | 1.44               | 1.06-1.96  | 0.018   | 1.56               | 1.05-2.31 | 0.027   |
|                                  | Missing      | 5    | P(overall): 0.003  |            |         | P(overall): <0.001 |           |         |
| Heart disease                    | No           | 1918 | 1                  | -          | -       | 1                  | -         | -       |
|                                  | Yes          | 456  | 1.46               | 1.30-1.65  | <0.001  | 1.11               | 0.96-1.28 | 0.150   |

|                                     |              |      | Univariate         |           |         | Multivariate       |           |         |
|-------------------------------------|--------------|------|--------------------|-----------|---------|--------------------|-----------|---------|
|                                     |              | N    | HR                 | CI 95%    | P-value | HR                 | CI 95%    | P-value |
| Diabetes                            | No           | 2189 | 1                  | -         | -       | 1                  | -         | -       |
|                                     | Yes          | 185  | 1.42               | 1.19-1.68 | <0.001  | 1.20               | 0.97-1.48 | 0.090   |
| Number of cytogenetic abnormalities | No           | 943  | 1                  | -         | -       | 1                  | -         | -       |
|                                     | 1            | 552  | 1.09               | 0.95-1.25 | 0.213   | 1.13               | 0.97-1.31 | 0.115   |
|                                     | 2            | 210  | 1.29               | 1.07-1.55 | 0.007   | 1.37               | 1.12-1.68 | 0.003   |
|                                     | 3            | 88   | 1.44               | 1.12-1.87 | 0.005   | 1.55               | 1.16-2.06 | 0.003   |
|                                     | 4            | 33   | 1.76               | 1.16-2.67 | 0.008   | 1.67               | 1.03-2.70 | 0.037   |
|                                     | ≥5           | 260  | 2.53               | 2.16-2.96 | <0.001  | 1.76               | 1.42-2.18 | <0.001  |
|                                     | Missing      | 288  | P(overall): <0.001 |           |         | P(overall): <0.001 |           |         |
| Genetic Risk                        | Favorable    | 380  | 1                  | -         | -       | 1                  | -         | -       |
|                                     | Intermediate | 1062 | 1.86               | 1.57-2.21 | <0.001  | 1.85               | 1.53-2.22 | <0.001  |
|                                     | Adverse      | 722  | 3.02               | 2.54-3.60 | <0.001  | 2.40               | 1.95-2.95 | <0.001  |
|                                     | Missing      | 210  | P(overall): <0.001 |           |         | P(overall): <0.001 |           |         |

**Supplement Table 4.** Survival analysis by Cox regression, with alternate TDT grouping.

|                                  |              | N    | Univariate |                    |         | Multivariate |                    |         |
|----------------------------------|--------------|------|------------|--------------------|---------|--------------|--------------------|---------|
|                                  |              |      | HR         | CI95%              | P-value | HR           | CI95%              | P-value |
| Time from Diagnosis to Treatment | 0-1d         | 583  | 1          | -                  | -       | 1            | -                  | -       |
|                                  | 2-3d         | 670  | 1.08       | 0.94-1.24          | 0.290   | 1.25         | 1.06-1.47          | 0.007   |
|                                  | 4-6d         | 469  | 1.29       | 1.11-1.50          | 0.001   | 1.10         | 0.92-1.32          | 0.296   |
|                                  | >6d          | 652  | 1.41       | 1.23-1.62          | <0.001  | 1.15         | 0.96-1.36          | 0.121   |
|                                  |              |      |            | P(overall): <0.001 |         |              | P(overall): 0.058  |         |
| Sex                              | Male         | 1289 | 1          | -                  | -       | 1            | -                  | -       |
|                                  | Female       | 1085 | 0.98       | 0.88-1.08          | 0.617   | 1.06         | 0.94-1.18          | 0.336   |
| Age (years)                      | (continuous) | 2374 | 1.04       | 1.03-1.04          | <0.001  | 1.02         | 1.01-1.02          | <0.001  |
| CR                               | Yes          | 1823 | 1          | -                  | -       | 1            | -                  | -       |
|                                  | No           | 546  | 9.67       | 8.58-10.90         | <0.001  | 5.20         | 4.47-6.05          | <0.001  |
|                                  | Missing      | 5    |            |                    |         |              |                    |         |
| AlloSCT                          | Yes, in CR1  | 573  | 1          | -                  | -       | 1            | -                  | -       |
|                                  | Yes, other   | 139  | 1.42       | 1.10-1.85          | 0.008   | 1.94         | 1.46-2.58          | <0.001  |
|                                  | No           | 1662 | 3.58       | 3.10-4.13          | <0.001  | 2.53         | 2.11-3.03          | <0.001  |
|                                  |              |      |            | P(overall): <0.001 |         |              | P(overall): <0.001 |         |
| AML type                         | De novo      | 1808 | 1          | -                  | -       | 1            | -                  | -       |
|                                  | tAML         | 183  | 1.99       | 1.68-2.36          | <0.001  | 1.31         | 1.06-1.61          | 0.012   |
|                                  | Sec AML      | 383  | 2.03       | 1.79-2.30          | <0.001  | 1.49         | 1.29-1.73          | <0.001  |
|                                  |              |      |            | P(overall): <0.001 |         |              | P(overall): <0.001 |         |
| ECOG performance status          | 0            | 690  | 1          | -                  | -       | 1            | -                  | -       |
|                                  | I            | 1245 | 1.29       | 1.15-1.45          | <0.001  | 1.07         | 0.93-1.23          | 0.322   |
|                                  | II           | 238  | 1.85       | 1.55-2.21          | <0.001  | 1.02         | 0.82-1.26          | 0.875   |
|                                  | III          | 91   | 2.85       | 2.23-3.64          | <0.001  | 2.14         | 1.61-2.84          | <0.001  |
|                                  | IV           | 41   | 3.73       | 2.64-5.27          | <0.001  | 3.78         | 2.37-6.02          | <0.001  |
|                                  | Missing      | 69   |            | P(overall): <0.001 |         |              | P(overall): <0.001 |         |
| BM blast %                       | (continuous) | 2297 | 1.00       | 1.00-1.00          | 0.161   | 1.00         | 1.00-1.00          | 0.064   |
|                                  | Missing      | 77   |            |                    |         |              |                    |         |
| Hemoglobin                       | (continuous) | 2368 | 1.00       | 0.99-1.00          | 0.009   | 1.00         | 1.00-1.00          | 0.460   |
|                                  | Missing      | 6    |            |                    |         |              |                    |         |
| Platelet count                   | (continuous) | 2364 | 1.00       | 1.00-1.00          | 0.044   | 1.00         | 1.00-1.00          | 0.060   |
|                                  | Missing      | 10   |            |                    |         |              |                    |         |
| WBC group                        | <5           | 981  | 1          | -                  | -       | 1            | -                  | -       |
|                                  | 5-10         | 240  | 1.06       | 0.89-1.25          | 0.536   | 1.34         | 1.10-1.63          | 0.003   |
|                                  | 10-20        | 270  | 0.91       | 0.77-1.08          | 0.301   | 1.08         | 0.89-1.30          | 0.460   |
|                                  | 20-50        | 377  | 1.06       | 0.92-1.22          | 0.443   | 1.18         | 0.99-1.40          | 0.061   |
|                                  | 50-100       | 259  | 1.08       | 0.91-1.28          | 0.363   | 1.32         | 1.08-1.63          | 0.008   |
|                                  | 100-200      | 181  | 1.41       | 1.17-1.69          | <0.001  | 1.56         | 1.25-1.94          | <0.001  |
|                                  | >200         | 61   | 1.45       | 1.07-1.97          | 0.016   | 1.61         | 1.09-2.39          | 0.016   |
|                                  | Missing      | 5    |            | P(overall): 0.003  |         |              | P(overall): <0.001 |         |
| Heart disease                    | No           | 1918 | 1          | -                  | -       | 1            | -                  | -       |
|                                  | Yes          | 456  | 1.46       | 1.30-1.65          | <0.001  | 1.05         | 0.91-1.22          | 0.468   |

|                                     |              | N    | Univariate         |           |         | Multivariate       |           |         |
|-------------------------------------|--------------|------|--------------------|-----------|---------|--------------------|-----------|---------|
|                                     |              |      | HR                 | CI95%     | P-value | HR                 | CI95%     | P-value |
| Diabetes                            | No           | 2189 | 1                  | -         | -       | 1                  | -         | -       |
|                                     | Yes          | 185  | 1.42               | 1.19-1.68 | <0.001  | 1.29               | 1.05-1.60 | 0.017   |
| Number of cytogenetic abnormalities | No           | 943  | 1                  | -         | -       | 1                  | -         | -       |
|                                     | 1            | 552  | 1.09               | 0.95-1.25 | 0.213   | 1.07               | 0.92-1.24 | 0.370   |
|                                     | 2            | 210  | 1.29               | 1.07-1.55 | 0.007   | 1.19               | 0.97-1.47 | 0.097   |
|                                     | 3            | 88   | 1.45               | 1.12-1.87 | 0.005   | 1.48               | 1.11-1.97 | 0.008   |
|                                     | 4            | 33   | 1.76               | 1.16-2.66 | 0.008   | 1.35               | 0.83-2.19 | 0.227   |
|                                     | ≥5           | 260  | 2.54               | 2.17-2.97 | <0.001  | 1.48               | 1.19-1.84 | <0.001  |
|                                     | Missing      | 288  | P(overall): <0.001 |           |         | P(overall): 0.008  |           |         |
| Genetic Risk                        | Favorable    | 380  | 1                  | -         | -       | 1                  | -         | -       |
|                                     | Intermediate | 1062 | 1.86               | 1.57-2.21 | <0.001  | 2.02               | 1.67-2.45 | <0.001  |
|                                     | Adverse      | 722  | 3.02               | 2.54-3.60 | <0.001  | 2.56               | 2.05-3.19 | <0.001  |
|                                     | Missing      | 210  | P(overall): <0.001 |           |         | P(overall): <0.001 |           |         |

**Supplement Table 5.** Treatment outcomes by Days from Diagnosis to Treatment, with alternate grouping.

|                 |                               | <b>P</b> | <b>Total</b>                       | <b>0-1d</b>                      | <b>2-3d</b>                      | <b>4-6d</b>                      | <b>&gt;6d</b>                    |
|-----------------|-------------------------------|----------|------------------------------------|----------------------------------|----------------------------------|----------------------------------|----------------------------------|
| All age classes | CR/CRi (%) [CI]               | <0.001   | 1823/2369<br>(77.0)<br>[75.2-78.6] | 466/582<br>(80.1)<br>[76.6-83.2] | 541/669<br>(80.9)<br>[77.7-83.8] | 360/467<br>(77.1)<br>[73.0-80.8] | 456/651<br>(70.0)<br>[66.4-73.5] |
|                 | Death within 30 days (%) [CI] | 0.099    | 170/2374<br>(7.2)<br>[6.2-8.3]     | 50/583<br>(8.6)<br>[6.4-11.2]    | 40/670<br>(6.0)<br>[4.3-8.0]     | 26/469<br>(5.5)<br>[3.7-8.0]     | 54/652<br>(8.3)<br>[6.3-10.7]    |
|                 | Death within 60 days (%) [CI] | 0.848    | 275/2374<br>(11.6)<br>[10.3-12.9]  | 70/583<br>(12.0)<br>[9.5-14.9]   | 74/670<br>(11.0)<br>[8.8-13.7]   | 51/469<br>(10.9)<br>[8.2-14.0]   | 80/652<br>(12.3)<br>[9.9-15.0]   |
|                 | Two-year survival, % [CI]     | <0.001   | 43.9<br>[41.9-45.9]                | 49.0<br>[45.0-53.3]              | 48.3<br>[44.6-52.3]              | 40.9<br>[36.6-45.6]              | 36.9<br>[33.3-40.8]              |
| <=60 years      | CR/CRi (%) [CI]               | 0.169    | 804/908<br>(88.5)<br>[86.3-90.5]   | 260/289<br>(90.0)<br>[85.9-93.2] | 240/266<br>(90.2)<br>[86.0-93.5] | 154/174<br>(88.5)<br>[82.8-92.8] | 150/179<br>(83.8)<br>[77.6-88.9] |
|                 | Death within 30 days (%) [CI] | 0.599    | 30/908<br>(3.3)<br>[2.2-4.7]       | 12/289<br>(4.2)<br>[2.2-8.4]     | 6/266<br>(2.3)<br>[0.8-4.8]      | 5/174<br>(2.9)<br>[0.9-6.6]      | 7/179<br>(3.9)<br>[1.6-7.9]      |
|                 | Death within 60 days (%) [CI] | 0.979    | 51/908<br>(5.6)<br>[4.2-7.3]       | 15/289<br>(5.2)<br>[2.9-7.1]     | 16/266<br>(6.0)<br>[3.5-9.6]     | 10/174<br>(5.7)<br>[2.8-10.3]    | 10/179<br>(5.6)<br>[2.7-10.0]    |
|                 | Two-year survival, % [CI]     | 0.159    | 60.7<br>[57.6-64.0]                | 61.3<br>[55.9-67.3]              | 65.7<br>[60.1-71.7]              | 57.6<br>[50.7-65.5]              | 55.7<br>[48.8-63.5]              |
| >60 years       | CR/CRi (%) [CI]               | 0.017    | 1019/1461<br>(69.7)<br>[67.3-72.1] | 206/293<br>(70.3)<br>[64.7-75.5] | 301/403<br>(74.7)<br>[70.1-78.9] | 206/293<br>(70.3)<br>[64.7-75.5] | 306/472<br>(64.8)<br>[60.3-69.1] |
|                 | Death within 30 days (%) [CI] | 0.094    | 118/1466<br>(8.0)<br>[6.7-9.6]     | 38/294<br>(12.9)<br>[9.3-17.3]   | 34/404<br>(8.4)<br>[5.9-11.6]    | 21/295<br>(7.1)<br>[4.5-10.7]    | 47/473<br>(9.9)<br>[7.4-13.0]    |
|                 | Death within 60 days (%) [CI] | 0.342    | 224/1466<br>(15.3)<br>[13.5-17.2]  | 55/294<br>(18.7)<br>[14.4-23.6]  | 58/404<br>(14.4)<br>[11.1-18.2]  | 41/295<br>(13.9)<br>[10.2-18.4]  | 70/473<br>(14.8)<br>[11.7-18.3]  |
|                 | Two-year survival, % [CI]     | 0.088    | 33.4<br>[31.0-35.9]                | 36.8<br>[31.7-42.9]              | 37.0<br>[32.5-42.1]              | 30.9<br>[26.0-36.8]              | 29.7<br>[25.8-34.2]              |
